# Supplementary material for: Apigenin and Ethaverine Hydrochloride Enhance Retinal Vascular Barrier In Vitro and In Vivo
Source: PubMed Central journal article supplement — Transl Vis Sci Technol. 2020 May 11;9(6):8. doi: 10.1167/tvst.9.6.8 (PMC7409011; doi:10.1167/tvst.9.6.8), 2020-05-11
Supplement: tvst-9-6-8_s001.pdf [file tvst-9-6-8_s001.pdf]

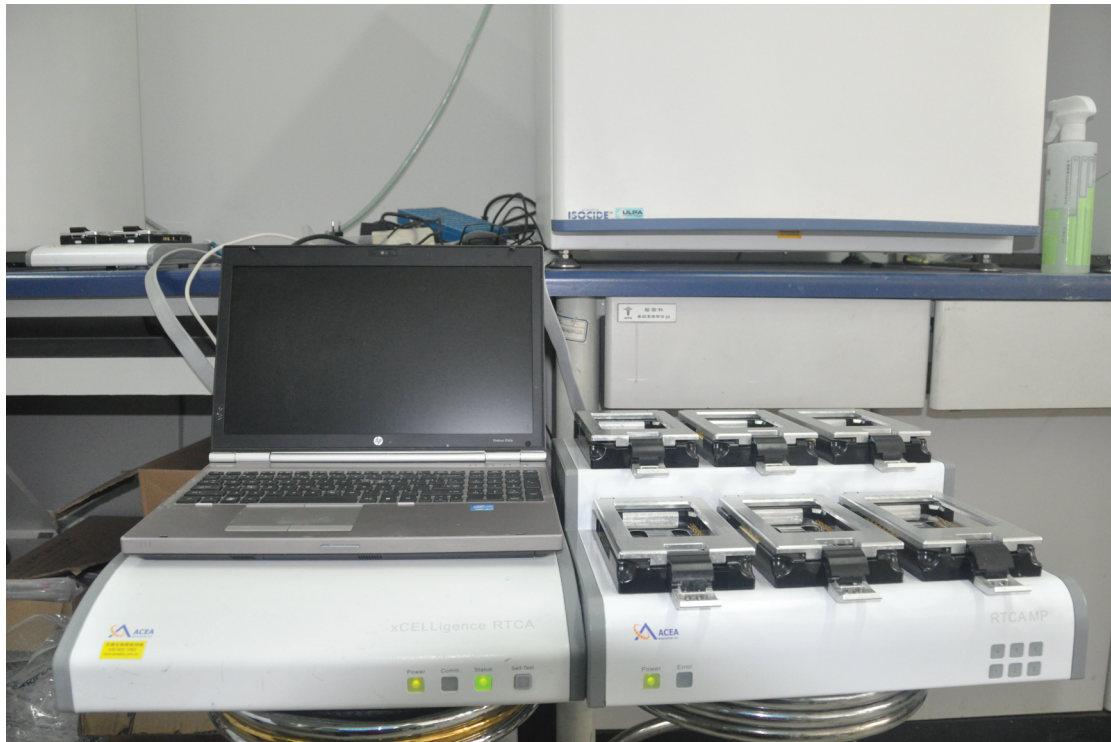

Supplement Figure 1. An image of the xCELLigenceRTCA MP system (ACEA Biosciences, Inc. USA) was used for this study. This instrument can monitor six 96 well plates simultaneously yet each plate is controlled independently from the other plates. The instrument is placed inside the tissue culture incubator. The cell growth and monolayer formation were monitored and controlled by the control unit and computer outside of the incubator.
